# Supplementary material for: Inhibition of yes‐associated protein down‐regulates PD‐L1 (CD274) expression in human malignant pleural mesothelioma
Source: PubMed Central journal article supplement (PMC5980156; doi:10.1111/jcmm.13593), 2018-03-24
Supplement: JCMM-22-3139-s003.pdf [file JCMM-22-3139-s003.pdf]

**Supplementary table S1.**

GTIIC reporter activity of MPM cell lines and NSCLC cell line A549

| Cell line | Normalized GTIIC reporter activity (Firefly/Renilla)<br>mean $\pm$ SD (percentage by control ) |
|-----------|------------------------------------------------------------------------------------------------|
| LP-9      | 1.000 $\pm$ 0.113                                                                              |
| H290      | 25.215 $\pm$ 1.449                                                                             |
| H2052     | 30.626 $\pm$ 1.608                                                                             |
| 211H      | 24.040 $\pm$ 1.695                                                                             |
| MS-1      | 14.868 $\pm$ 0.764                                                                             |
| H28       | 22.143 $\pm$ 3.102                                                                             |
| H2452     | 0.389 $\pm$ 0.117                                                                              |
| A549      | 0.724 $\pm$ 0.008                                                                              |
