# Supplementary material for: Inhibition of yes‐associated protein down‐regulates PD‐L1 (CD274) expression in human malignant pleural mesothelioma
Source: PubMed Central journal article supplement (PMC5980156; doi:10.1111/jcmm.13593), 2018-03-24
Supplement: JCMM-22-3139-s004.pdf [file JCMM-22-3139-s004.pdf]

**Supplementary table S2**

YAP mRNA level percentage by control

| Cell line | YAP mRNA<br>mean $\pm$ SD (percentage by control) |
|-----------|---------------------------------------------------|
| LP-9      | 1.000 $\pm$ 0.041                                 |
| H290      | 11.247 $\pm$ 1.080                                |
| H2052     | 18.137 $\pm$ 2.095                                |
| 211H      | 8.663 $\pm$ 1.276                                 |
| MS-1      | 14.837 $\pm$ 3.824                                |
| H28       | 8.209 $\pm$ 1.036                                 |
| H2452     | 0.799 $\pm$ 0.119                                 |
| A549      | 0.414 $\pm$ 0.085                                 |
