# Supplementary material for: Inhibition of yes‐associated protein down‐regulates PD‐L1 (CD274) expression in human malignant pleural mesothelioma
Source: PubMed Central journal article supplement (PMC5980156; doi:10.1111/jcmm.13593), 2018-03-24
Supplement: JCMM-22-3139-s005.pdf [file JCMM-22-3139-s005.pdf]

**Supplementary table S3.**

PD-L1 (CD274) mRNA level percentage by control

| Cell line | PD-L1 (CD274) mRNA<br>mean $\pm$ SD (percentage by control) |
|-----------|-------------------------------------------------------------|
| LP-9      | 1.000 $\pm$ 0.192                                           |
| H290      | 0.614 $\pm$ 0.134                                           |
| H2052     | 5.979 $\pm$ 0.833                                           |
| 211H      | 6.281 $\pm$ 1.577                                           |
| MS-1      | 1.271 $\pm$ 0.057                                           |
| H28       | 0.382 $\pm$ 0.059                                           |
| H2452     | 0.468 $\pm$ 0.023                                           |
| A549      | 0.609 $\pm$ 0.091                                           |
